# Supplementary material
Source: PubMed Central journal article supplement (PMC3667754)

Supplemental  
Figure 1

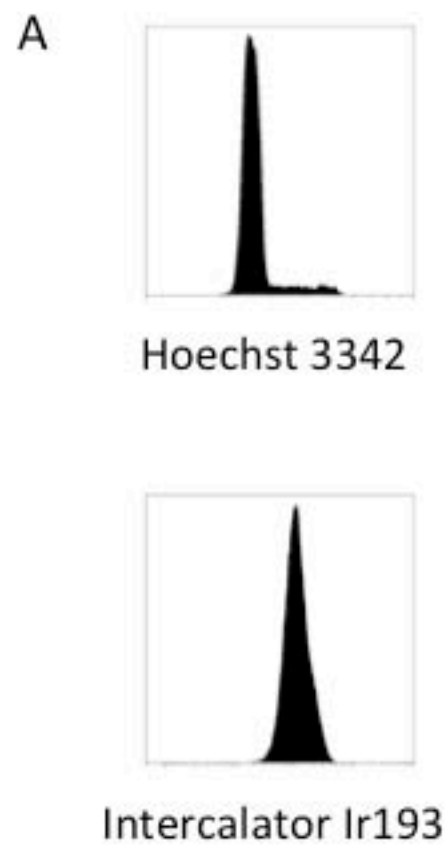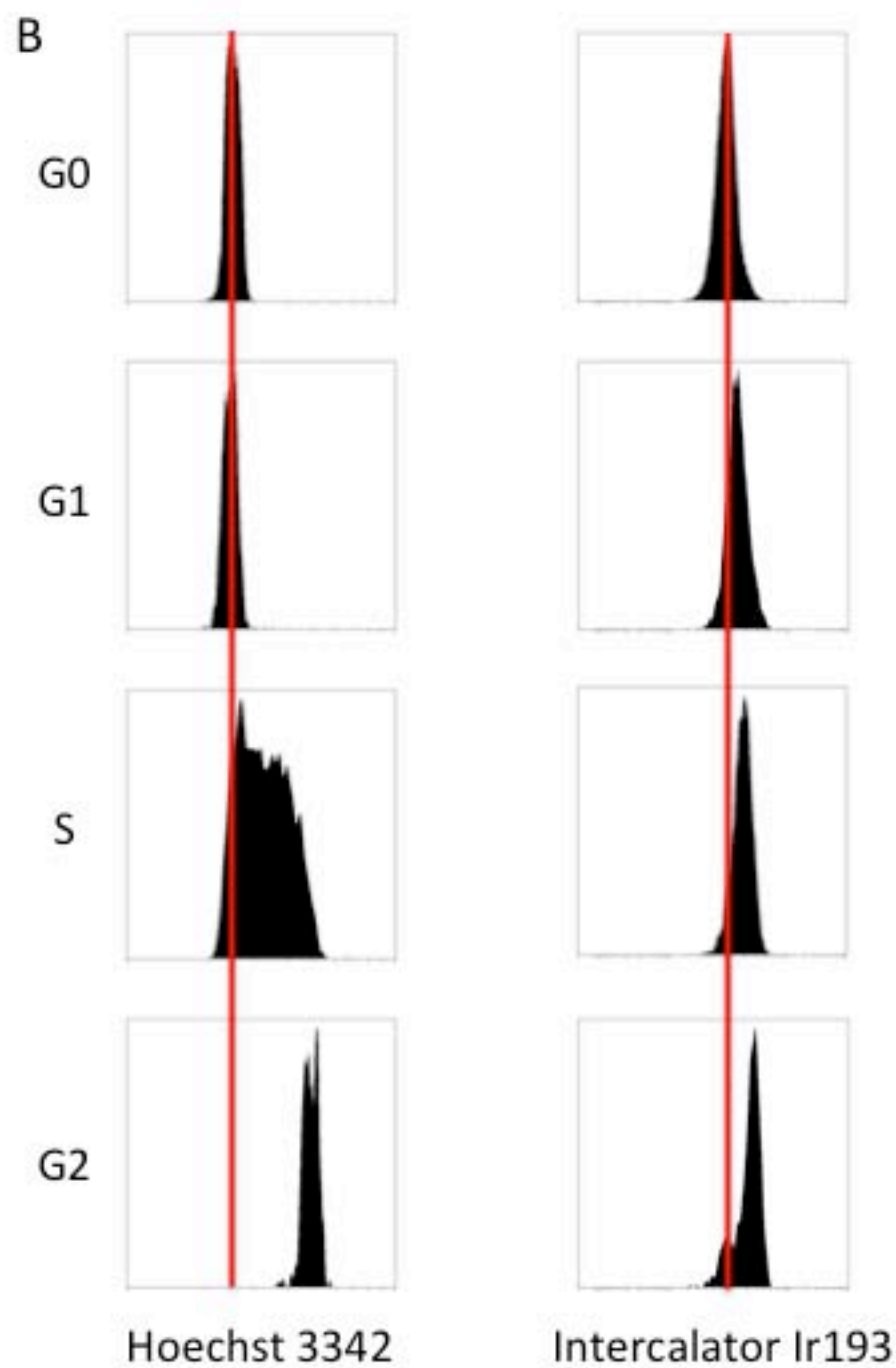

## Supplemental Figure 2

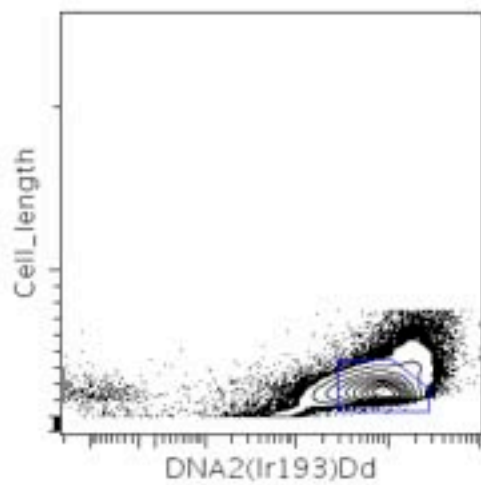

Supplemental  
Figure 3

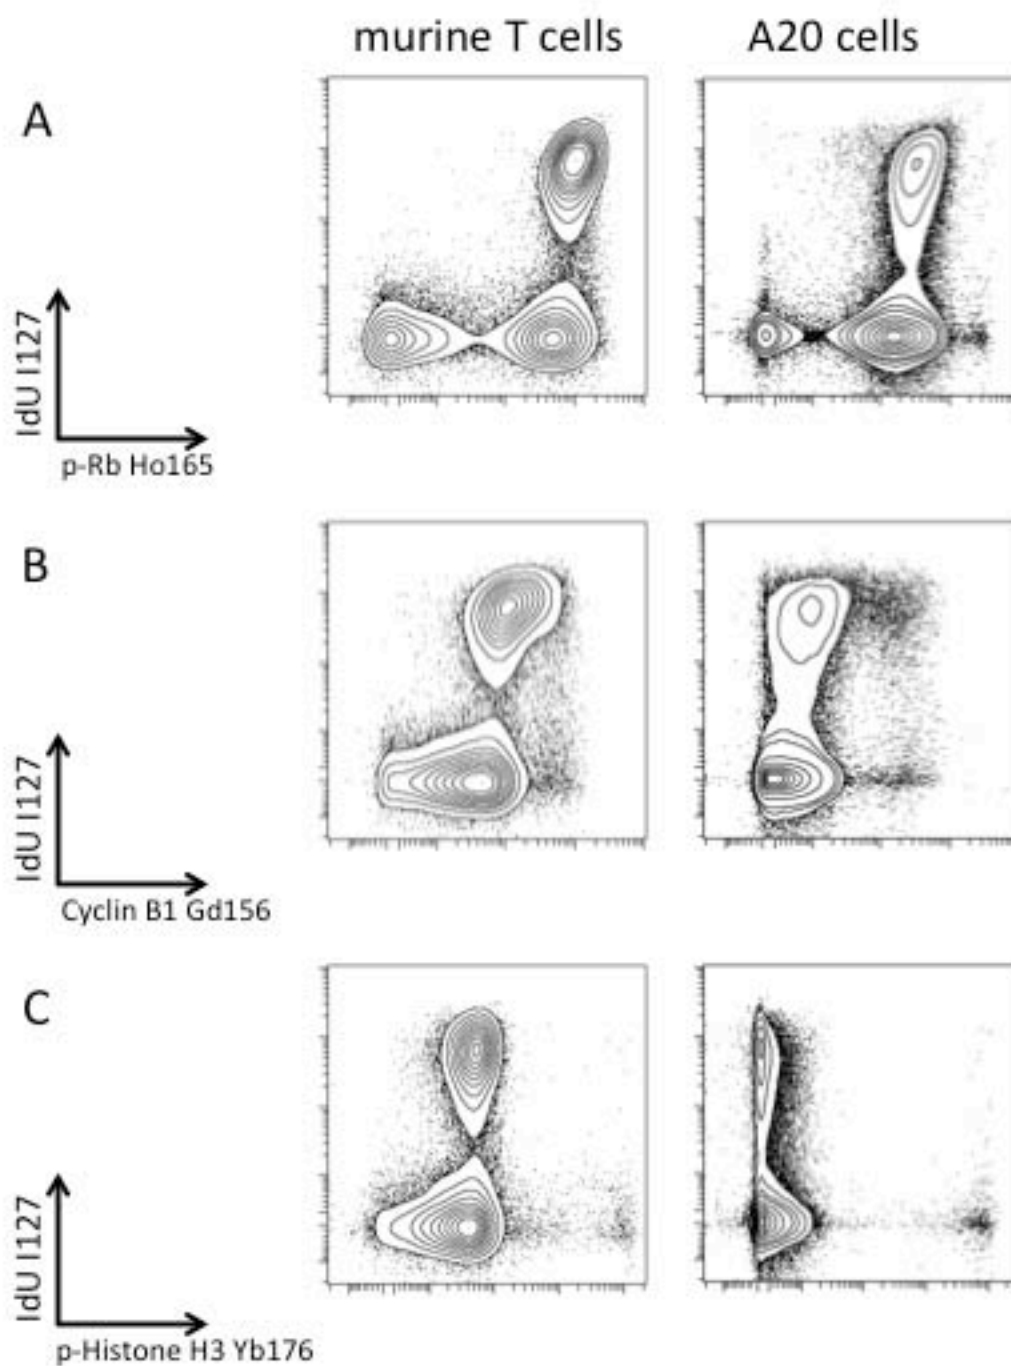

D

### A-20 Cell Cycle Distribution

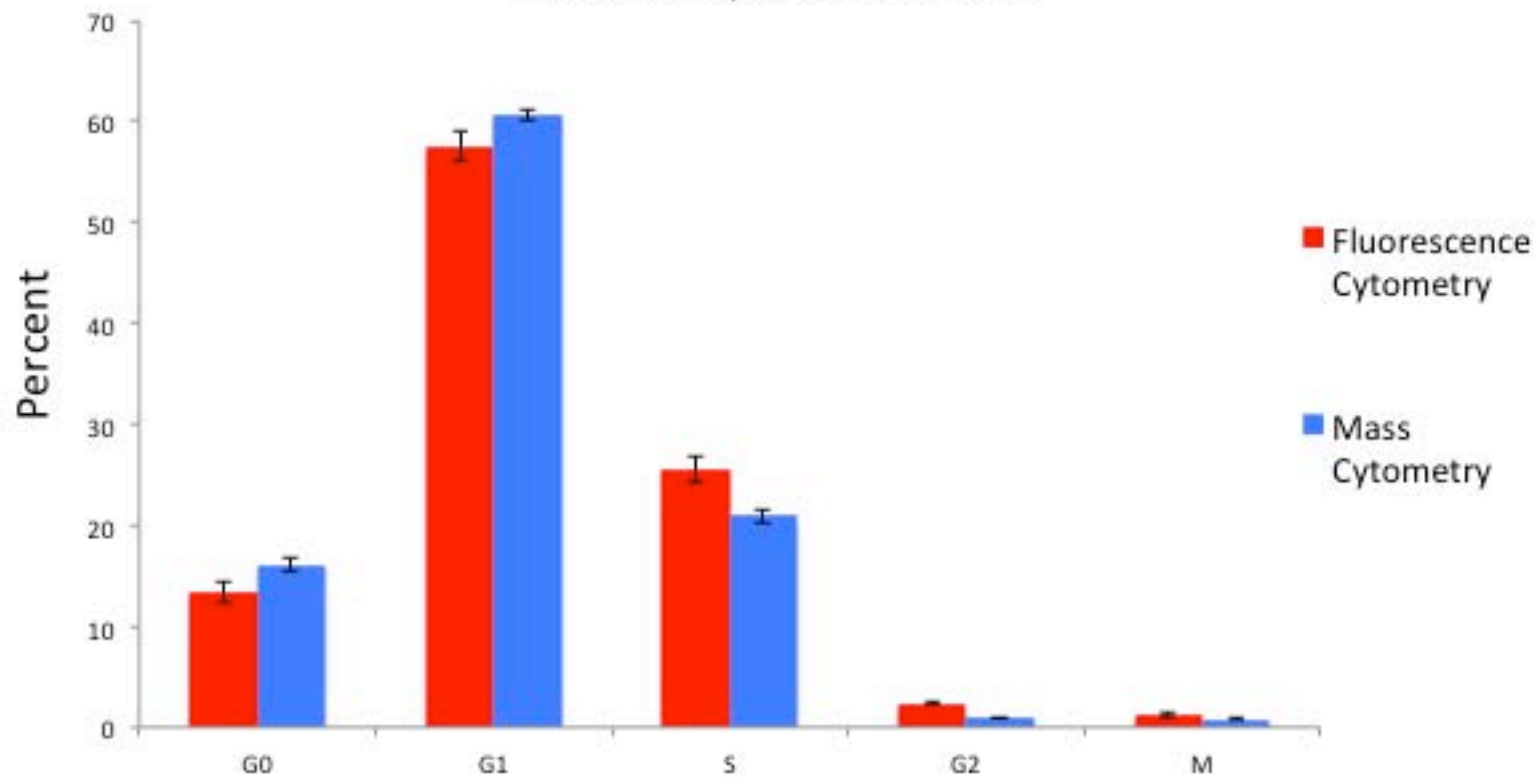

Supplemental Figure 4

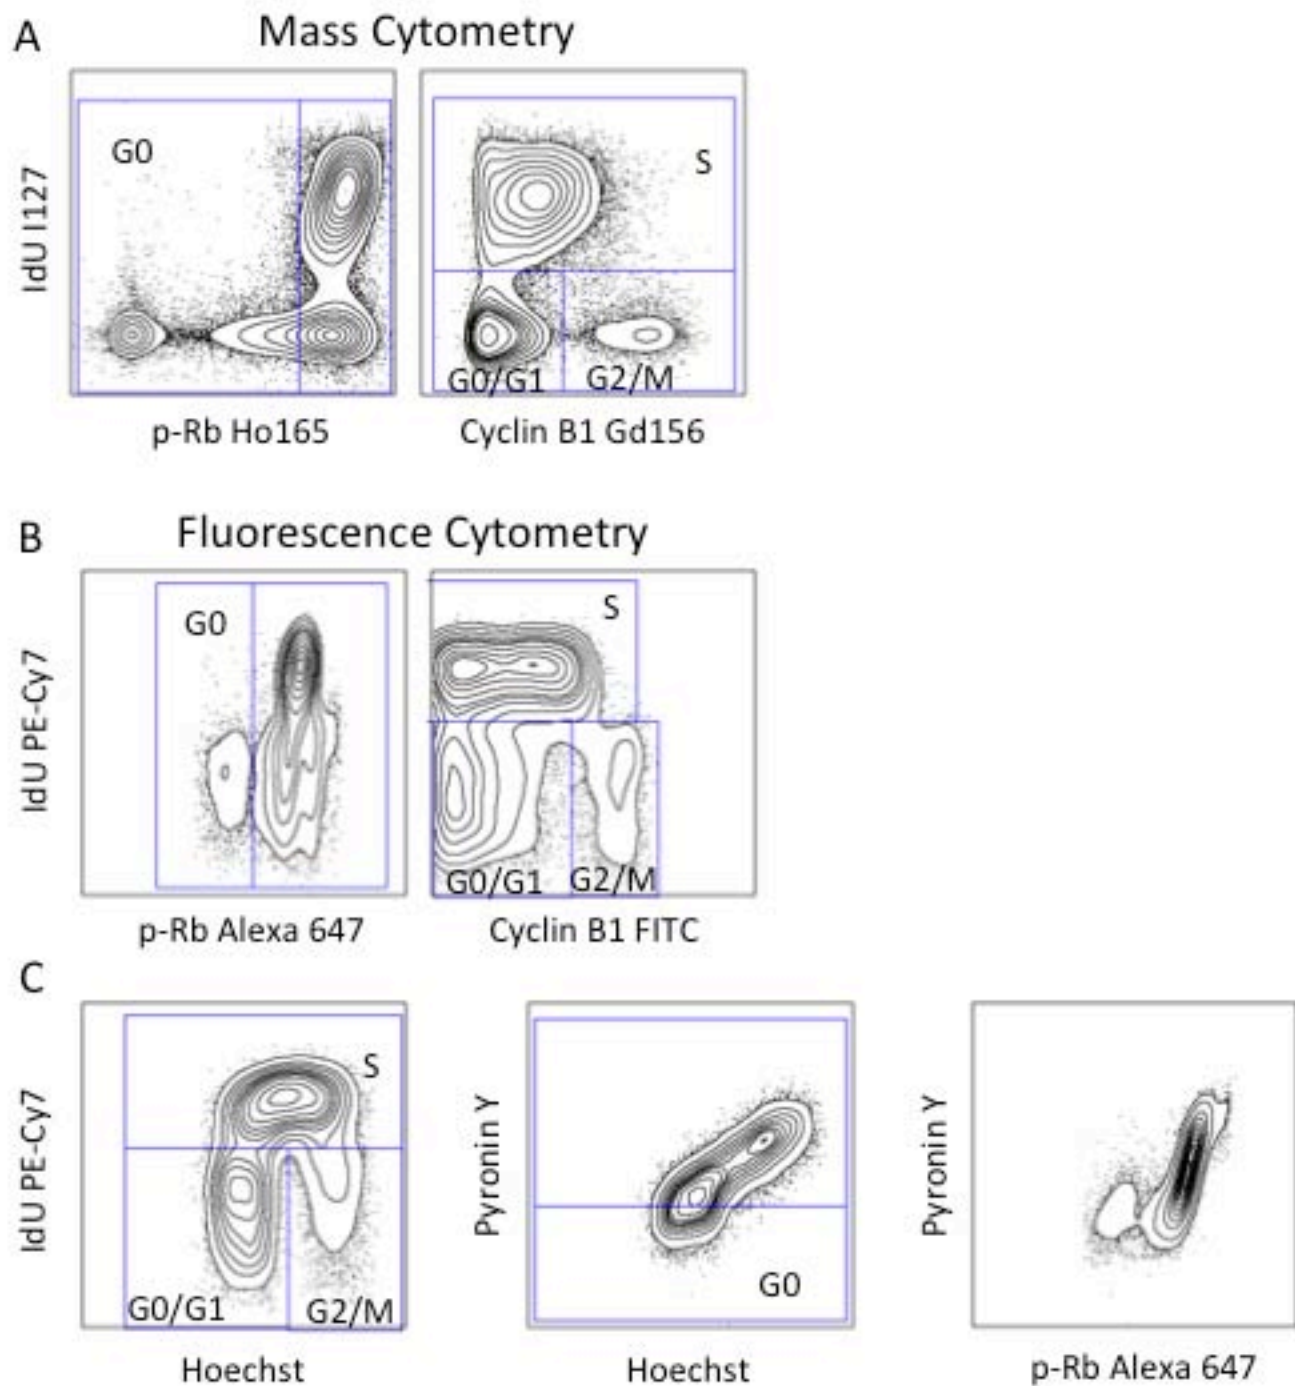

## Supplemental Figure 5

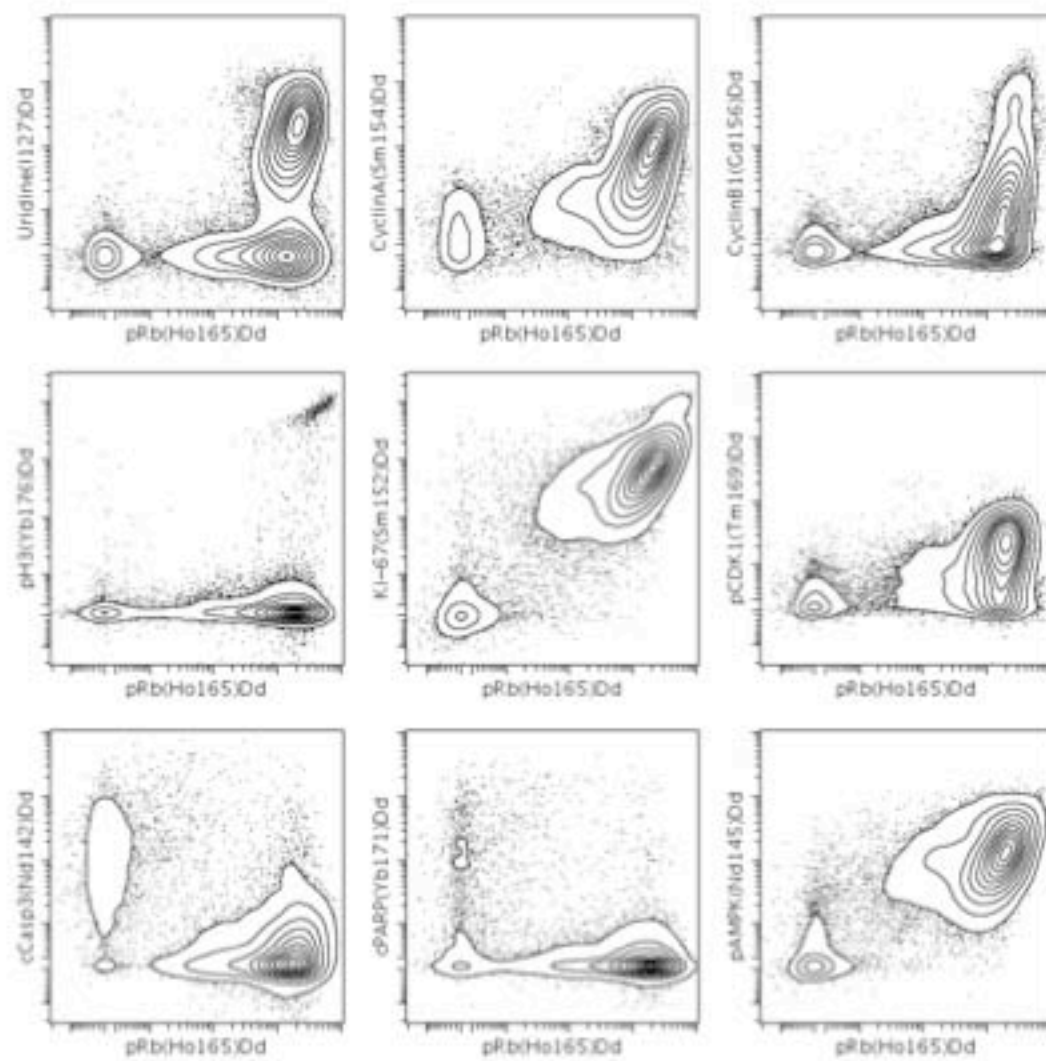

Supplemental  
Figure 6

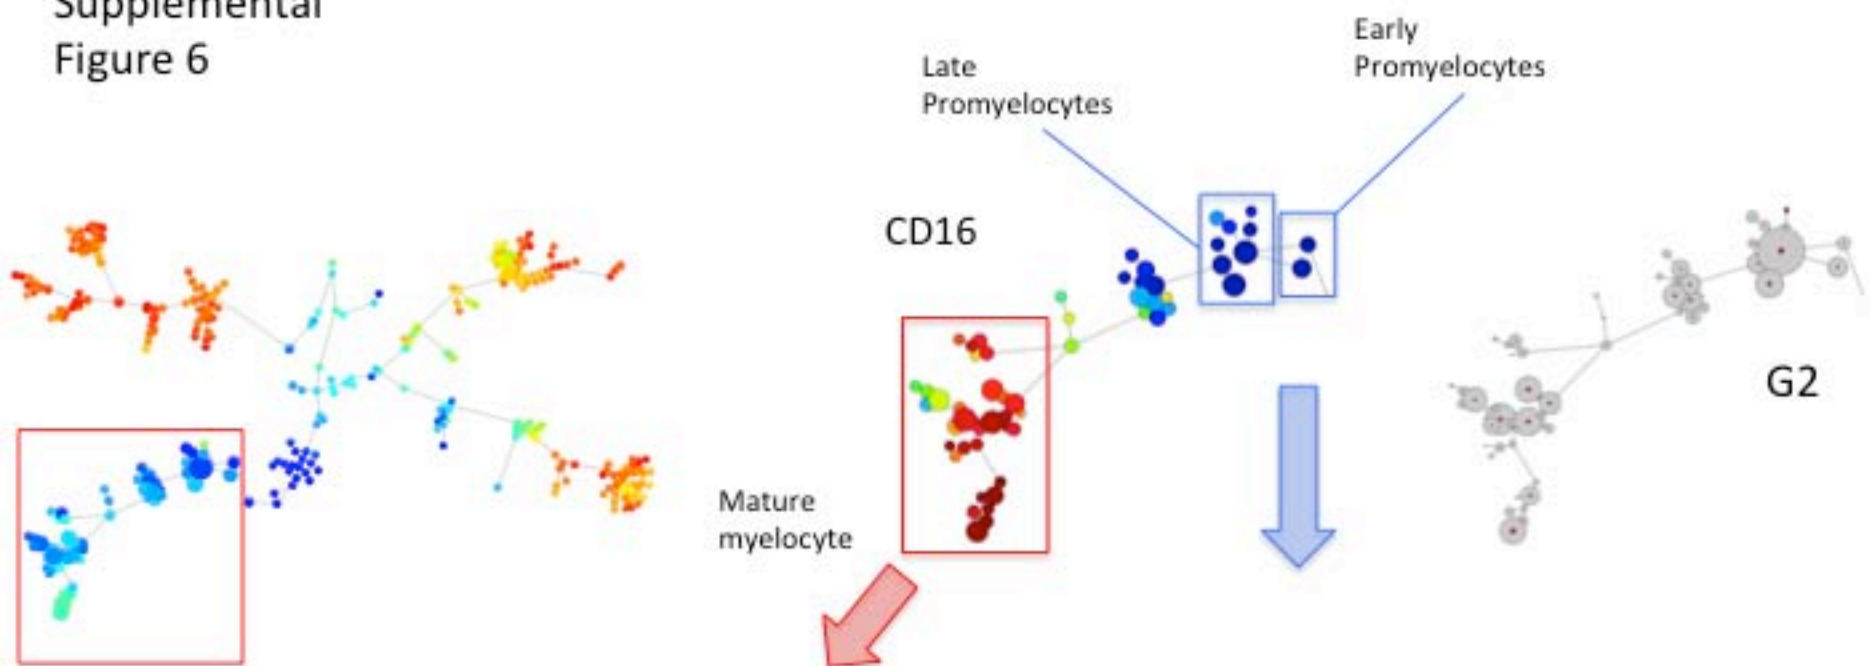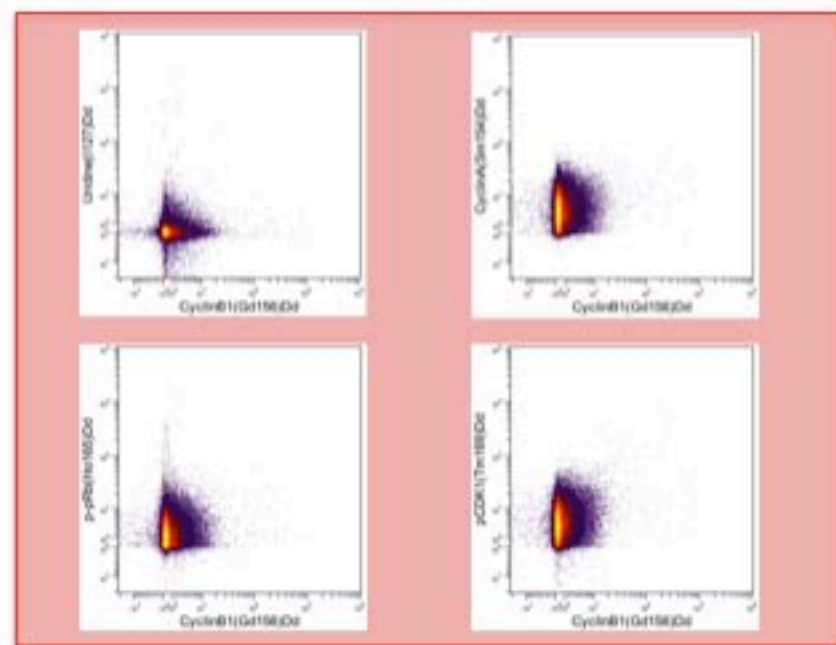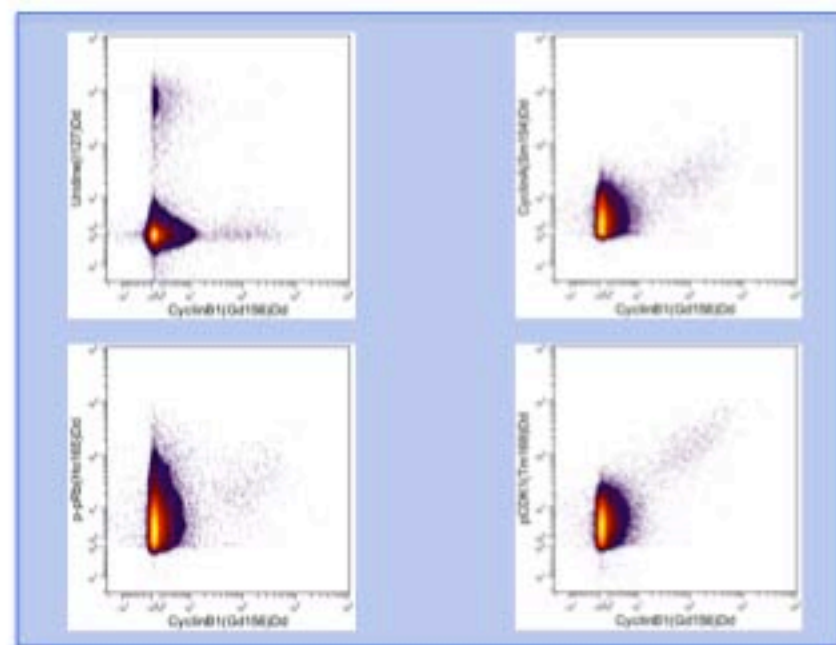

Supplement: NIHMS456780-supplement-Supp_Fig_S1-S6.pdf [file NIHMS456780-supplement-Supp_Fig_S1-S6.pdf]
